# Supplementary material
Source: Springer Nature journal article supplement (https://www.springermedizin.de/resource/supplementary/12914_2008_62_MOESM2_ESM.pdf/9537492)
Supplement: MOESM2 [file 9537492]

# Economic burden of diabetes

Measurement approaches

**Willingness-to-pay approach**

**Cost-of-illness approach** (debility, morbidity & mortality)

**Macroeconomic / Production function approach**

**Direct cost**

**Indirect cost**

**Intangible cost:**

- ◆ Physical pain
- ◆ Psychological pain

**Household:**

- ◆ Prevention costs, e.g. exercise, diet
- ◆ Treatment costs, e.g. transport, user fees
- ◆ Other health care access costs (e.g. bribes)

**Organization & operation of health system:**

- ◆ Prevention, e.g. health education
- ◆ Medicines (insulin, oral drugs)
- ◆ Hotel costs (HRH time, utilities, food, materials, equipment, building space)
- ◆ Diagnostic costs (HBA1c test, lipid profile, proteinuria test, blood sugar, test, electrocardiogram)
- ◆ Other costs

**Short-term cost:**

Value of productive time lost due to diabetes

**Indirect cost:**

- ◆ Premature mortality
- ◆ Permanent disability
- ◆ Temporary disability
- ◆ Time of family caregivers
